# Supplementary material for: Play like me: Similarity in playfulness promotes social play
Source: PLoS One. 2019 Oct 24;14(10):e0224282. doi: 10.1371/journal.pone.0224282 (PMC6812795; doi:10.1371/journal.pone.0224282)
Supplement: S1 Dataset — (XLSX) [file pone.0224282.s002.xlsx]

## Sheet: Home Cage raw data
Cage	Subject	Group	Heterogenous_Homogenous_Group	Legend	T1_AN	T2_AN	T3_AN	T1_PN	T2_PN	T3_PN	T1_BPN	T2_BPN	T3_BPN
1	D4	HII	1	PN = pinning	1	5	0	5	23	0	11	0	26
1	K3	HII	1	AN = attack to nape	4	28	4	11	16	14	9	24	0
1	F3	HII	1	BPN = being pinned	1	1	7	4	1	26	0	16	14
2	B2	HII	1	T = time	2	2	5	19	0	6	17	27	41
2	W1	HII	1		8	5	11	5	15	17	25	3	17
2	S1	HII	1		4	2	12	23	16	37	5	1	2
3	K2	HII	1		12	0	1	15	0	0	12	0	0
3	D2	HII	1		6	1	8	12	0	0	15	6	1
3	H2	HII	1		0	4	8	0	6	1	0	0	0
4	R1	HII	1		13	1	20	28	4	18	17	2	7
4	W2	HII	1		7	2	2	15	2	0	19	13	21
4	N2	HII	1		1	3	19	6	13	26	13	4	16
5	L4	HII	1		5	29	1	11	7	7	10	16	0
5	K4	HII	1		0	14	11	0	28	10	0	11	22
5	C2	HII	1		6	30	10	10	21	22	11	29	17
6	R4	LII	1		2	4	12	11	0	10	4	0	33
6	S4	LII	1		0	0	7	0	0	5	0	0	18
6	P1	LII	1		5	0	8	4	0	40	11	0	4
7	F1	LII	1		14	0	28	7	0	39	18	0	49
7	L3	LII	1		9	0	32	32	0	45	1	0	38
7	N4	LII	1		15	0	11	19	0	7	39	0	4
8	M1	LII	1		5	1	0	20	10	0	0	0	0
8	D3	LII	1		4	4	0	0	0	0	20	0	1
8	E1	LII	1		0	3	1	0	0	1	0	10	0
9	W4	LII	1		45	23	0	30	40	0	23	20	0
9	T2	LII	1		5	20	0	2	11	0	0	14	0
9	E3	LII	1		19	22	0	23	27	0	32	44	0
10	U3	LII	1		12	17	6	31	22	15	19	0	3
10	M3	LII	1		2	21	2	4	9	3	14	20	2
10	L2	LII	1		23	10	13	16	1	1	18	12	14
11	K1	HHH	2		4	18	1	8	5	0	1	23	18
11	L1	HHH	2		2	31	0	1	23	0	8	8	0
11	F2	HHH	2		0	24	5	0	3	18	0	0	0
12	T3	HHH	2		1	17	11	1	22	4	0	2	16
12	S2	HHH	2		19	1	11	1	0	11	40	0	30
12	G2	HHH	2		21	16	32	39	2	45	1	22	14
13	H4	HHH	2		14	30	2	23	48	2	33	17	3
13	S3	HHH	2		4	17	1	33	42	0	14	37	4
13	G3	HHH	2		19	9	3	26	6	7	35	42	2
14	G4	HHH	2		17	5	0	31	9	0	30	2	1
14	F4	HHH	2		12	4	5	19	1	12	14	2	0
14	C3	HHH	2		7	13	0	11	3	0	17	9	11
15	D1	HHH	2		34	14	2	58	10	0	31	3	0
15	N3	HHH	2		10	0	1	3	0	0	49	0	0
15	A4	HHH	2		10	17	0	30	3	0	11	10	0
16	Q4	LLL	2		31	11	13	58	8	20	9	3	5
16	E4	LLL	2		13	1	8	15	1	22	86	17	24
16	C4	LLL	2		12	8	6	41	13	4	19	2	17
17	Q3	LLL	2		22	17	9	22	5	6	23	37	0
17	N1	LLL	2		17	19	1	37	9	8	26	4	26
17	P3	LLL	2		32	23	10	46	31	20	56	4	8
18	T4	LLL	2		26	16	0	51	10	12	40	13	1
18	W3	LLL	2		24	32	1	35	27	0	37	13	10
18	U4	LLL	2		49	5	11	37	8	11	46	19	12
19	B4	LLL	2		4	0	7	36	0	0	8	1	7
19	P2	LLL	2		6	6	0	6	12	0	29	21	0
19	M4	LLL	2		1	3	5	2	21	7	7	11	0
20	Q1	LLL	2		14	18	1	42	54	3	27	36	0
20	A1	LLL	2		15	27	3	14	34	21	27	39	7
20	R2	LLL	2		23	6	3	34	10	4	36	23	21
21	H3	III	2		14	8	14	12	13	5	8	18	12
21	G1	III	2		15	11	12	7	4	1	12	13	5
21	A3	III	2		0	14	15	1	15	13	0	1	2
22	H1	III	2		21	10	7	4	2	8	76	17	7
22	M2	III	2		21	5	5	32	10	6	4	7	12
22	T1	III	2		18	16	2	44	16	5	0	4	0
23	B3	III	2		4	0	0	1	0	0	0	3	0
23	C1	III	2		14	7	11	45	12	17	17	27	4
23	E2	III	2		17	19	10	17	29	4	46	11	17
24	A2	III	2		37	13	9	45	18	16	3	16	0
24	U1	III	2		44	5	10	14	5	1	51	24	17
24	Q2	III	2		71	28	7	50	36	12	55	19	12
25	P4	III	2		3	2	6	5	5	3	2	2	0
25	U2	III	2		5	5	5	2	2	0	5	5	7
25	R3	III	2		1	1	4	0	0	6	0	0	2

## Sheet: HC Pinning, Multilevel Analysis
Subject	Cage	Heterogenous_homogenous_group	Group	Time	PNgroupcentered	PN
D4	1	1	HII	1	-6.11	5
K3	1	1	HII	1	-0.11	11
F3	1	1	HII	1	-7.11	4
B2	2	1	HII	1	7.89	19
W1	2	1	HII	1	-6.11	5
S1	2	1	HII	1	11.89	23
K2	3	1	HII	1	3.89	15
D2	3	1	HII	1	0.89	12
H2	3	1	HII	1	-11.11	0
R1	4	1	HII	1	16.89	28
W2	4	1	HII	1	3.89	15
N2	4	1	HII	1	-5.11	6
L4	5	1	HII	1	-0.11	11
K4	5	1	HII	1	-11.11	0
C2	5	1	HII	1	-1.11	10
R4	6	1	LII	1	0.22	11
S4	6	1	LII	1	-10.78	0
P1	6	1	LII	1	-6.78	4
F1	7	1	LII	1	-3.78	7
L3	7	1	LII	1	21.22	32
N4	7	1	LII	1	8.22	19
M1	8	1	LII	1	9.22	20
D3	8	1	LII	1	-10.78	0
E1	8	1	LII	1	-10.78	0
W4	9	1	LII	1	19.22	30
T2	9	1	LII	1	-8.78	2
E3	9	1	LII	1	12.22	23
U3	10	1	LII	1	20.22	31
M3	10	1	LII	1	-6.78	4
L2	10	1	LII	1	5.22	16
K1	11	2	HHH	1	-4.44	8
L1	11	2	HHH	1	-11.44	1
F2	11	2	HHH	1	-12.44	0
T3	12	2	HHH	1	-11.44	1
S2	12	2	HHH	1	-11.44	1
G2	12	2	HHH	1	26.56	39
H4	13	2	HHH	1	10.56	23
S3	13	2	HHH	1	20.56	33
G3	13	2	HHH	1	13.56	26
G4	14	2	HHH	1	18.56	31
F4	14	2	HHH	1	6.56	19
C3	14	2	HHH	1	-1.44	11
D1	15	2	HHH	1	45.56	58
N3	15	2	HHH	1	-9.44	3
A4	15	2	HHH	1	17.56	30
Q4	16	2	LLL	1	38.96	58
E4	16	2	LLL	1	-4.04	15
C4	16	2	LLL	1	21.96	41
Q3	17	2	LLL	1	2.96	22
N1	17	2	LLL	1	17.96	37
P3	17	2	LLL	1	26.96	46
T4	18	2	LLL	1	31.96	51
W3	18	2	LLL	1	15.96	35
U4	18	2	LLL	1	17.96	37
B4	19	2	LLL	1	16.96	36
P2	19	2	LLL	1	-13.04	6
M4	19	2	LLL	1	-17.04	2
Q1	20	2	LLL	1	22.96	42
A1	20	2	LLL	1	-5.04	14
R2	20	2	LLL	1	14.96	34
H3	21	2	III	1	-0.07	12
G1	21	2	III	1	-5.07	7
A3	21	2	III	1	-11.07	1
H1	22	2	III	1	-8.07	4
M2	22	2	III	1	19.93	32
T1	22	2	III	1	31.93	44
B3	23	2	III	1	-11.07	1
C1	23	2	III	1	32.93	45
E2	23	2	III	1	4.93	17
A2	24	2	III	1	32.93	45
U1	24	2	III	1	1.93	14
Q2	24	2	III	1	37.93	50
P4	25	2	III	1	-7.07	5
U2	25	2	III	1	-10.07	2
R3	25	2	III	1	-12.07	0
D4	1	1	HII	2	11.89	23
K3	1	1	HII	2	4.89	16
F3	1	1	HII	2	-10.11	1
B2	2	1	HII	2	-11.11	0
W1	2	1	HII	2	3.89	15
S1	2	1	HII	2	4.89	16
K2	3	1	HII	2	-11.11	0
D2	3	1	HII	2	-11.11	0
H2	3	1	HII	2	-5.11	6
R1	4	1	HII	2	-7.11	4
W2	4	1	HII	2	-9.11	2
N2	4	1	HII	2	1.89	13
L4	5	1	HII	2	-4.11	7
K4	5	1	HII	2	16.89	28
C2	5	1	HII	2	9.89	21
R4	6	1	LII	2	-10.78	0
S4	6	1	LII	2	-10.78	0
P1	6	1	LII	2	-10.78	0
F1	7	1	LII	2	-10.78	0
L3	7	1	LII	2	-10.78	0
N4	7	1	LII	2	-10.78	0
M1	8	1	LII	2	-0.78	10
D3	8	1	LII	2	-10.78	0
E1	8	1	LII	2	-10.78	0
W4	9	1	LII	2	29.22	40
T2	9	1	LII	2	0.22	11
E3	9	1	LII	2	16.22	27
U3	10	1	LII	2	11.22	22
M3	10	1	LII	2	-1.78	9
L2	10	1	LII	2	-9.78	1
K1	11	2	HHH	2	-7.44	5
L1	11	2	HHH	2	10.56	23
F2	11	2	HHH	2	-9.44	3
T3	12	2	HHH	2	9.56	22
S2	12	2	HHH	2	-12.44	0
G2	12	2	HHH	2	-10.44	2
H4	13	2	HHH	2	35.56	48
S3	13	2	HHH	2	29.56	42
G3	13	2	HHH	2	-6.44	6
G4	14	2	HHH	2	-3.44	9
F4	14	2	HHH	2	-11.44	1
C3	14	2	HHH	2	-9.44	3
D1	15	2	HHH	2	-2.44	10
N3	15	2	HHH	2	-12.44	0
A4	15	2	HHH	2	-9.44	3
Q4	16	2	LLL	2	-11.04	8
E4	16	2	LLL	2	-18.04	1
C4	16	2	LLL	2	-6.04	13
Q3	17	2	LLL	2	-14.04	5
N1	17	2	LLL	2	-10.04	9
P3	17	2	LLL	2	11.96	31
T4	18	2	LLL	2	-9.04	10
W3	18	2	LLL	2	7.96	27
U4	18	2	LLL	2	-11.04	8
B4	19	2	LLL	2	-19.04	0
P2	19	2	LLL	2	-7.04	12
M4	19	2	LLL	2	1.96	21
Q1	20	2	LLL	2	34.96	54
A1	20	2	LLL	2	14.96	34
R2	20	2	LLL	2	-9.04	10
H3	21	2	III	2	0.93	13
G1	21	2	III	2	-8.07	4
A3	21	2	III	2	2.93	15
H1	22	2	III	2	-10.07	2
M2	22	2	III	2	-2.07	10
T1	22	2	III	2	3.93	16
B3	23	2	III	2	-12.07	0
C1	23	2	III	2	-0.07	12
E2	23	2	III	2	16.93	29
A2	24	2	III	2	5.93	18
U1	24	2	III	2	-7.07	5
Q2	24	2	III	2	23.93	36
P4	25	2	III	2	-7.07	5
U2	25	2	III	2	-10.07	2
R3	25	2	III	2	-12.07	0
D4	1	1	HII	3	-11.11	0
K3	1	1	HII	3	2.89	14
F3	1	1	HII	3	14.89	26
B2	2	1	HII	3	-5.11	6
W1	2	1	HII	3	5.89	17
S1	2	1	HII	3	25.89	37
K2	3	1	HII	3	-11.11	0
D2	3	1	HII	3	-11.11	0
H2	3	1	HII	3	-10.11	1
R1	4	1	HII	3	6.89	18
W2	4	1	HII	3	-11.11	0
N2	4	1	HII	3	14.89	26
L4	5	1	HII	3	-4.11	7
K4	5	1	HII	3	-1.11	10
C2	5	1	HII	3	10.89	22
R4	6	1	LII	3	-0.78	10
S4	6	1	LII	3	-5.78	5
P1	6	1	LII	3	29.22	40
F1	7	1	LII	3	28.22	39
L3	7	1	LII	3	34.22	45
N4	7	1	LII	3	-3.78	7
M1	8	1	LII	3	-10.78	0
D3	8	1	LII	3	-10.78	0
E1	8	1	LII	3	-9.78	1
W4	9	1	LII	3	-10.78	0
T2	9	1	LII	3	-10.78	0
E3	9	1	LII	3	-10.78	0
U3	10	1	LII	3	4.22	15
M3	10	1	LII	3	-7.78	3
L2	10	1	LII	3	-9.78	1
K1	11	2	HHH	3	-12.44	0
L1	11	2	HHH	3	-12.44	0
F2	11	2	HHH	3	5.56	18
T3	12	2	HHH	3	-8.44	4
S2	12	2	HHH	3	-1.44	11
G2	12	2	HHH	3	32.56	45
H4	13	2	HHH	3	-10.44	2
S3	13	2	HHH	3	-12.44	0
G3	13	2	HHH	3	-5.44	7
G4	14	2	HHH	3	-12.44	0
F4	14	2	HHH	3	-0.44	12
C3	14	2	HHH	3	-12.44	0
D1	15	2	HHH	3	-12.44	0
N3	15	2	HHH	3	-12.44	0
A4	15	2	HHH	3	-12.44	0
Q4	16	2	LLL	3	0.96	20
E4	16	2	LLL	3	2.96	22
C4	16	2	LLL	3	-15.04	4
Q3	17	2	LLL	3	-13.04	6
N1	17	2	LLL	3	-11.04	8
P3	17	2	LLL	3	0.96	20
T4	18	2	LLL	3	-7.04	12
W3	18	2	LLL	3	-19.04	0
U4	18	2	LLL	3	-8.04	11
B4	19	2	LLL	3	-19.04	0
P2	19	2	LLL	3	-19.04	0
M4	19	2	LLL	3	-12.04	7
Q1	20	2	LLL	3	-16.04	3
A1	20	2	LLL	3	1.96	21
R2	20	2	LLL	3	-15.04	4
H3	21	2	III	3	-7.07	5
G1	21	2	III	3	-11.07	1
A3	21	2	III	3	0.93	13
H1	22	2	III	3	-4.07	8
M2	22	2	III	3	-6.07	6
T1	22	2	III	3	-7.07	5
B3	23	2	III	3	-12.07	0
C1	23	2	III	3	4.93	17
E2	23	2	III	3	-8.07	4
A2	24	2	III	3	3.93	16
U1	24	2	III	3	-11.07	1
Q2	24	2	III	3	-0.07	12
P4	25	2	III	3	-9.07	3
U2	25	2	III	3	-12.07	0
R3	25	2	III	3	-6.07	6

## Sheet: Seeders & I Rats, Heter. Groups
	cage	GrHII_5_vsLII_7	Play_T1	PLayT2	PLayT3		PlayT1	PLay_T2	Play_T3		PLay__T1	PLay__T2	PLay__T3		C_a_g_e	HLSeeders_Nonseeders		Play___T1	Play___2	Play___3
First set of tests	1	5	7.5	8.5	20	2nd test	5	23	0	3rd test	7.5	8.5	20	4th-6th tests	1	4	4=seeders, 5=I pairs	5	23	0
I rat pairs in HII vs. I rat pairs in LII	2	5	14	15.5	27	All seeders	19	0	6	all I rat pairs	14	15.5	27	all seeders vs. all I rat pairs	1	5		7.5	8.5	20
5 = I rats pairs in HII, 7 = I rat pairs in LII	3	5	6	3	0.5		15	0	0		6	3	0.5		2	4		19	0	6
	4	5	10.5	7.5	13		28	4	18		10.5	7.5	13		2	5		14	15.5	27
	5	5	5	24.5	16		11	7	7		5	24.5	16		3	4		15	0	0
	6	7	2	0	22.5		11	0	10		2	0	22.5		3	5		6	3	0.5
	7	7	25.5	0	26		7	0	39		25.5	0	26		4	4		28	4	18
	8	7	0	0	0.5		20	10	0		0	0	0.5		4	5		10.5	7.5	13
	9	7	12.5	19	0		30	40	0		12.5	19	0		5	4		11	7	7
	10	7	10	5	2		31	22	15		10	5	2		5	5		5	24.5	16
															6	4		11	0	10
															6	5		2	0	22.5
															7	4		7	0	39
															7	5		25.5	0	26
															8	4		20	10	0
															8	5		0	0	0.5
															9	4		30	40	0
															9	5		12.5	19	0
															10	4		31	22	15
															10	5		10	5	2

## Sheet: PIP and HC Correlations
Legend	Cage	PIP2_PN_all	PIP1_PN_all	Subject	Group	Inhom_Hom_Group	T1_PN_HC	T2_PN_HC	T3_PN_HC	SQRTplus_PIP2_PN	SQRTplus_HC_T2_PN	SQRTplus_HC_T3_PN
PIP = play in plairs test	1	33	91	D4	HII	1	5	23	0	5.78792	4.84768	0.707107
PN = pinning	1	24	72	K3	HII	1	11	16	14	4.94975	4.06202	3.80789
Inhom = inhomogenous/heterogeneous group	1	13	56	F3	HII	1	4	1	26	3.67423	1.22474	5.14782
Hom = homogeneous group	2	21	106	B2	HII	1	19	0	6	4.63681	0.707107	2.54951
HC = home cage play	2	29	54	W1	HII	1	5	15	17	5.43139	3.937	4.1833
T = time	2	17	59	S1	HII	1	23	16	37	4.1833	4.06202	6.12372
	3	40	95	K2	HII	1	15	0	0	6.36396	0.707107	0.707107
	3	33	55	D2	HII	1	12	0	0	5.78792	0.707107	0.707107
	3	12	49	H2	HII	1	0	6	1	3.53553	2.54951	1.22474
	4	34	87	R1	HII	1	28	4	18	5.87367	2.12132	4.30116
	4	20	48	W2	HII	1	15	2	0	4.52769	1.58114	0.707107
	4	15	59	N2	HII	1	6	13	26	3.937	3.67423	5.14782
	5	38	89	L4	HII	1	11	7	7	6.20484	2.73861	2.73861
	5	12	57	K4	HII	1	0	28	10	3.53553	5.33854	3.24037
	5	14	43	C2	HII	1	10	21	22	3.80789	4.63681	4.74342
	6	28	32	R4	LII	1	11	0	10	5.33854	0.707107	3.24037
	6	9	61	S4	LII	1	0	0	5	3.08221	0.707107	2.34521
	6	19	53	P1	LII	1	4	0	40	4.41588	0.707107	6.36396
	7	20	33	F1	LII	1	7	0	39	4.52769	0.707107	6.2849
	7	26	63	L3	LII	1	32	0	45	5.14782	0.707107	6.74537
	7	25	52	N4	LII	1	19	0	7	5.04975	0.707107	2.73861
	8	16	31	M1	LII	1	20	10	0	4.06202	3.24037	0.707107
	8	27	55	D3	LII	1	0	0	0	5.24404	0.707107	0.707107
	8	22	52	E1	LII	1	0	0	1	4.74342	0.707107	1.22474
	9	9	29	W4	LII	1	30	40	0	3.08221	6.36396	0.707107
	9	27	38	T2	LII	1	2	11	0	5.24404	3.39116	0.707107
	9	21	56	E3	LII	1	23	27	0	4.63681	5.24404	0.707107
	10	16	25	U3	LII	1	31	22	15	4.06202	4.74342	3.937
	10	32	35	M3	LII	1	4	9	3	5.70088	3.08221	1.87083
	10	16	46	L2	LII	1	16	1	1	4.06202	1.22474	1.22474
	11	33	87	K1	HHH	2	8	5	0	5.78792	2.34521	0.707107
	11	37	84	L1	HHH	2	1	23	0	6.12372	4.84768	0.707107
	11	31	69	F2	HHH	2	0	3	18	5.61249	1.87083	4.30116
	12	14	69	T3	HHH	2	1	22	4	3.80789	4.74342	2.12132
	12	5	72	S2	HHH	2	1	0	11	2.34521	0.707107	3.39116
	12	5	78	G2	HHH	2	39	2	45	2.34521	1.58114	6.74537
	13	24	87	H4	HHH	2	23	48	2	4.94975	6.96419	1.58114
	13	16	65	S3	HHH	2	33	42	0	4.06202	6.5192	0.707107
	13	26	62	G3	HHH	2	26	6	7	5.14782	2.54951	2.73861
	14	23	92	G4	HHH	2	31	9	0	4.84768	3.08221	0.707107
	14	32	75	F4	HHH	2	19	1	12	5.70088	1.22474	3.53553
	14	21	78	C3	HHH	2	11	3	0	4.63681	1.87083	0.707107
	15	31	83	D1	HHH	2	58	10	0	5.61249	3.24037	0.707107
	15	31	69	N3	HHH	2	3	0	0	5.61249	0.707107	0.707107
	15	38	62	A4	HHH	2	30	3	0	6.20484	1.87083	0.707107
	16	9	44	Q4	LLL	2	58	8	20	3.08221	2.91548	4.52769
	16	37	39	E4	LLL	2	15	1	22	6.12372	1.22474	4.74342
	16	23	40	C4	LLL	2	41	13	4	4.84768	3.67423	2.12132
	17	13	41	Q3	LLL	2	22	5	6	3.67423	2.34521	2.54951
	17	24	36	N1	LLL	2	37	9	8	4.94975	3.08221	2.91548
	17	39	35	P3	LLL	2	46	31	20	6.2849	5.61249	4.52769
	18	24	42	T4	LLL	2	51	10	12	4.94975	3.24037	3.53553
	18	13	38	W3	LLL	2	35	27	0	3.67423	5.24404	0.707107
	18	32	38	U4	LLL	2	37	8	11	5.70088	2.91548	3.39116
	19	26	45	B4	LLL	2	36	0	0	5.14782	0.707107	0.707107
	19	7	33	P2	LLL	2	6	12	0	2.73861	3.53553	0.707107
	19	8	27	M4	LLL	2	2	21	7	2.91548	4.63681	2.73861
	20	11	35	Q1	LLL	2	42	54	3	3.39116	7.38241	1.87083
	20	16	36	A1	LLL	2	14	34	21	4.06202	5.87367	4.63681
	20	29	36	R2	LLL	2	34	10	4	5.43139	3.24037	2.12132
	21	47	44	H3	III	2	12	13	5	6.89202	3.67423	2.34521
	21	16	45	G1	III	2	7	4	1	4.06202	2.12132	1.22474
	21	12	31	A3	III	2	1	15	13	3.53553	3.937	3.67423
	22	12	46	H1	III	2	4	2	8	3.53553	1.58114	2.91548
	22	25	47	M2	III	2	32	10	6	5.04975	3.24037	2.54951
	22	21	32	T1	III	2	44	16	5	4.63681	4.06202	2.34521
	23	35	63	B3	III	2	1	0	0	5.95819	0.707107	0.707107
	23	23	51	C1	III	2	45	12	17	4.84768	3.53553	4.1833
	23	4	61	E2	III	2	17	29	4	2.12132	5.43139	2.12132
	24	13	51	A2	III	2	45	18	16	3.67423	4.30116	4.06202
	24	12	58	U1	III	2	14	5	1	3.53553	2.34521	1.22474
	24	61	59	Q2	III	2	50	36	12	7.84219	6.04152	3.53553
	25	20	70	P4	III	2	5	5	3	4.52769	2.34521	1.87083
	25	15	55	U2	III	2	2	2	0	3.937	1.58114	0.707107
	25	13	65	R3	III	2	0	0	6	3.67423	0.707107	2.54951

## Sheet: Intra-Observer Reliability
NapeAttack1	NapeAttack2	Pin1	PIn2	DiffNape1_2	Diff_Pin1_2	MeanNape1_2	MeanPin1_2
5	5	4	4	0	0	5	4
10	10	13	15	0	-2	10	14
31	31	4	4	0	0	31	4
8	8	6	6	0	0	8	6
15	13	16	12	2	4	14	14
4	6	8	6	-2	2	5	7
9	7	15	11	2	4	8	13
17	17	23	24	0	-1	17	23.5
5	5	22	19	0	3	5	20.5
6	4	10	11	2	-1	5	10.5
4	3	9	7	1	2	3.5	8
14	14	9	9	0	0	14	9
7	6	8	7	1	1	6.5	7.5
6	6	19	21	0	-2	6	20
1	1	6	6	0	0	1	6
9	9	15	15	0	0	9	15
4	3	5	5	1	0	3.5	5
3	2	1	1	1	0	2.5	1
8	8	7	7	0	0	8	7
8	9	11	11	-1	0	8.5	11
9	10	3	3	-1	0	9.5	3
7	7	14	16	0	-2	7	15
11	11	12	10	0	2	11	11
10	9	35	37	1	-2	9.5	36
7	8	12	10	-1	2	7.5	11
11	13	3	4	-2	-1	12	3.5
1	2	17	17	-1	0	1.5	17
11	14	15	19	-3	-4	12.5	17
4	6	18	21	-2	-3	5	19.5
6	5	19	19	1	0	5.5	19

## Sheet: Play Role Index
Legend	Cage	Subject	T1_PN	T1_BPN	PlayRole_HC_T1	Cage_Average_HC_T1	T2_PN	T2_BPN	PlayRole_HC_T2	Cage_Average_HC_T2	T3_PN	T3_BPN	PlayRole_HC_T3	Cage_Average_HC_T3	TOT_PN	TOT_BPN	PlayRole_HC_Tot	Cage_Average_HC_Tot	Cage	PlayRole_HC_T1_byCage	PlayRole_HC_T2_byCage	PlayRole_HC_T3_byCage	PlayRole_HC_Tot_byCage		Subject	Cage*	PIP1_PN	PIP1_BPN	PlayRole_PIP1	Cage_Average_PIP1	Cage*	PlayRole_PIP1_byCage		Cage	Subject	PIP2_PN	PIP2_BPN	PlayRole_PIP2	Cage_Average_PIP2	Cage	PlayRole_PIP2_byCage
PN = pinning	1	D4	5	11	0.375		23	0	1		0	26	1		28	37	0.138462		1	0.491667	0.694118	0.766667	0.0876544		A1	1	36	53	0.191011		1	0.180003		1	D4	33	29	0.0645161		1	0.0659498
BPN = being pinned	1	K3	11	9	0.1		16	24	0.2		14	0	1		41	33	0.108108		2	0.455026	0.849673	0.547372	0.48418		A2	1	51	35	0.186047		2	0.270348		1	F3	13	17	0.133333		2	0.141296
HC = home cage	1	F3	4	0	1	0.491667	1	16	0.882353	0.694118	26	14	0.3	0.766667	31	30	0.0163934	0.0876544	3	0.111111	1	1	0.46841		A3	1	31	46	0.194805		3	0.208516		1	K3	24	24	0	0.0659498	3	0.260468
T1 = time 1	2	B2	19	17	0.0555556		0	27	1		6	41	0.744681		25	85	0.545455		4	0.243504	0.532026	0.559365	0.327974		A4	1	62	46	0.148148	0.180003	4	0.1448		2	B2	21	29	0.16		4	0.102694
T2 = time 2	2	W1	5	25	0.666667		15	3	0.666667		17	17	0		37	45	0.097561		5	0.047619	0.329067	0.501068	0.0421313		B1	2	34	83	0.418803		5	0.226069		2	S1	17	19	0.0555556		5	0.311111
T3 = time 3	2	S1	23	5	0.642857	0.455026	16	1	0.882353	0.849673	37	2	0.897436	0.547372	76	8	0.809524	0.48418	6	0.466667		0.639428	0.444202		B2	2	106	37	0.482517		6	0.156014		2	W1	29	19	0.208333	0.141296	6	0.225219
PIP1 = first play in pairs test	3	K2	15	12	0.111111		0	0			0	0			15	12	0.111111		7	0.574741		0.1569	0.253268		B3	2	63	69	0.0454545		7	0.171872		3	D2	33	32	0.0153846		7	0.0726385
PIP2 = second play in pairs test	3	D2	12	15	0.111111		0	6	1		0	1	1		12	22	0.294118		8	1	1	1	0.939394		B4	2	45	59	0.134615	0.270348	8	0.258323		3	H2	12	32	0.454545		8	0.35241
	3	H2	0	0		0.111111	6	0	1	1	1	0	1	1	7	0	1	0.46841	9	0.431904	0.230923		0.160775		C1	3	51	71	0.163934		9	0.164738		3	K2	40	21	0.311475	0.260468	9	0.337163
	4	R1	28	17	0.244444		4	2	0.333333		18	7	0.44		50	26	0.315789		10	0.284793	0.741821	0.577778	0.43836		C2	2.54762	43	70	0.238938		10	0.207856		4	N2	15	21	0.166667		10	0.205644
	4	W2	15	19	0.117647		2	13	0.733333		0	21	1		17	53	0.514286		11	0.777778	0.708909	1	0.575758		C3	2.7381	78	31	0.431193		11	0.176843		4	R1	34	32	0.030303		11	0.0398779
	4	N2	6	13	0.368421	0.243504	13	4	0.529412	0.532026	26	16	0.238095	0.559365	45	33	0.153846	0.327974	12	0.967073	0.833333	0.529613	0.43523		C4	3.09221	40	40	0	0.208516	12	0.206946		4	W2	20	16	0.111111	0.102694	12	0.350705
	5	L4	11	10	0.047619		7	16	0.391304		7	0	1		25	26	0.0196078		13	0.243456	0.430071	0.585185	0.217186		D1	4	83	71	0.0779221		13	0.0793533		5	C2	14	19	0.151515		13	0.0436939
	5	K4	0	0			28	11	0.435897		10	22	0.375		38	33	0.0704225		14	0.127398	0.489899	1	0.293401		D2	3.50823	55	63	0.0677966		14	0.151474		5	K4	12	28	0.4		14	0.212072
	5	C2	10	11	0.047619	0.047619	21	29	0.16	0.329067	22	17	0.128205	0.501068	53	57	0.0363636	0.0421313	15	0.550467	0.538462		0.480057		D3	3.71623	55	89	0.236111		15	0.386716		5	L4	38	17	0.381818	0.311111	15	0.132988
	6	R4	11	4	0.466667		0	0			10	33	0.534884		21	37	0.275862		16	0.600327	0.692256	0.420842	0.472543		D4	3.92424	91	61	0.197368	0.1448	16	0.0692231		6	P1	19	23	0.0952381		16	0.28891
	6	S4	0	0			0	0			5	18	0.565217		5	18	0.565217		17	0.0982882	0.639316	0.652661	0.161421		E1	5	52	69	0.140496		17	0.180003		6	R4	28	16	0.272727		17	0.298974
	6	P1	4	11	0.466667	0.466667	0	0			40	4	0.818182	0.639428	44	15	0.491525	0.444202	18	0.0856969	0.295947	0.629877	0.107965		E2	5	61	31	0.326087		18	0.0860939		6	S4	9	17	0.307692	0.225219	18	0.0383023
	7	F1	7	18	0.44		0	0			39	49	0.113636		46	67	0.185841		19	0.616354	0.528409	1	0.368401		E3	5	56	40	0.166667		19	0.216623		7	F1	20	23	0.0697674		19	0.44443
	7	L3	32	1	0.939394		0	0			45	38	0.0843373		77	39	0.327586		20	0.187679	0.220811	0.726667	0.166797		E4	4.75628	39	68	0.271028	0.226069				7	L3	26	28	0.037037		20	0.265491
	7	N4	19	39	0.344828	0.574741	0	0			7	4	0.272727	0.1569	26	43	0.246377	0.253268	21	0.487719	0.521901	0.603922	0.452906		F1	6	33	68	0.346535					7	N4	25	20	0.111111	0.0726385	21	0.321341
	8	M1	20	0	1		10	0	1		0	0			30	0	1		22	0.892593	0.521981	0.466667	0.663519		F2	6	69	59	0.078125					8	D3	27	6	0.636364		22	0.336441
	8	D3	0	20	1		0	0			0	1	1		0	21	1		23	0.63731	0.611538	0.619048	0.302221		F3	6	56	53	0.0275229					8	E1	22	36	0.241379		23	0.607677
	8	E1	0	0		1	0	10	1	1	1	0	1	1	1	10	0.818182	0.939394	24	0.497283	0.341029	0.62963	0.440106		F4	6	75	53	0.171875	0.156014				8	M1	16	23	0.179487	0.35241	24	0.489768
	9	W4	30	23	0.132075		40	20	0.333333		0	0			70	43	0.238938		25	0.428571	0.428571	0.833333	0.549486		G1	7	45	63	0.166667					9	E3	21	18	0.0769231		25	0.203704
	9	T2	2	0	1		11	14	0.12		0	0			13	14	0.037037								G2	7	78	74	0.0263158					9	T2	27	11	0.421053
	9	E3	23	32	0.163636	0.431904	27	44	0.239437	0.230923	0	0			50	76	0.206349	0.160775							G3	7	62	91	0.189542					9	W4	9	28	0.513514	0.337163
	10	U3	31	19	0.24		22	0	1		15	3	0.666667		68	22	0.511111								G4	7	92	49	0.304965	0.171872				10	L2	16	29	0.288889
	10	M3	4	14	0.555556		9	20	0.37931		3	2	0.2		16	36	0.384615								H1	8	46	68	0.192982					10	M3	32	24	0.142857
	10	L2	16	18	0.0588235	0.284793	1	12	0.846154	0.741821	1	14	0.866667	0.577778	18	44	0.419355	0.43836							H2	8	49	80	0.24031					10	U3	16	11	0.185185	0.205644
	11	K1	8	1	0.777778		5	23	0.642857		0	18	1		13	42	0.527273								H3	8	44	51	0.0736842					11	F2	31	35	0.0606061
	11	L1	1	8	0.777778		23	8	0.483871		0	0			24	16	0.2								H4	8	87	27	0.526316	0.258323				11	K1	33	31	0.03125
	11	F2	0	0		0.777778	3	0	1	0.708909	18	0	1	1	21	0	1	0.575758							K1	9	87	78	0.0545455					11	L1	37	35	0.0277778	0.0398779
	12	T3	1	0	1		22	2	0.833333		4	16	0.6		27	18	0.2								K2	9	95	54	0.275168					12	G2	5	7	0.166667
	12	S2	1	40	0.95122		0	0			11	30	0.463415		12	70	0.707317								K3	9	72	87	0.0943396					12	S2	5	12	0.411765
	12	G2	39	1	0.95	0.967073	2	22	0.833333	0.833333	45	14	0.525424	0.529613	86	37	0.398374	0.43523							K4	9	57	92	0.234899	0.164738				12	T3	14	5	0.473684	0.350705
	13	H4	23	33	0.178571		48	17	0.476923		2	3	0.2		73	53	0.15873								L1	10	84	81	0.0181818					13	G3	26	24	0.04
	13	S3	33	14	0.404255		42	37	0.0632911		0	4	1		75	55	0.153846								L2	10	46	104	0.386667					13	H4	24	27	0.0588235
	13	G3	26	35	0.147541	0.243456	6	42	0.75	0.430071	7	2	0.555556	0.585185	39	79	0.338983	0.217186							L3	10	63	55	0.0677966					13	S3	16	15	0.0322581	0.0436939
	14	G4	31	30	0.0163934		9	2	0.636364		0	1	1		40	33	0.0958904								L4	10	89	42	0.358779	0.207856				14	C3	21	13	0.235294
	14	F4	19	14	0.151515		1	2	0.333333		12	0	1		32	16	0.333333								M1	11	31	43	0.162162					14	F4	32	24	0.142857
	14	C3	11	17	0.214286	0.127398	3	9	0.5	0.489899	0	11	1	1	14	37	0.45098	0.293401							M2	11	47	22	0.362319					14	G4	23	39	0.258065	0.212072
	15	D1	58	31	0.303371		10	3	0.538462		0	0			68	34	0.333333								M3	11	35	44	0.113924					15	A4	38	45	0.0843373
	15	N3	3	49	0.884615		0	0			0	0			3	49	0.884615								M4	11	27	31	0.0689655	0.176843				15	D1	31	19	0.24
	15	A4	30	11	0.463415	0.550467	3	10	0.538462	0.538462	0	0			33	21	0.222222	0.480057							N1	12	36	60	0.25					15	N3	31	36	0.0746269	0.132988
	16	Q4	58	9	0.731343		8	3	0.454545		20	5	0.6		86	17	0.669903								N2	12	59	38	0.216495					16	C4	23	24	0.0212766
	16	E4	15	86	0.70297		1	17	0.888889		22	24	0.0434783		38	127	0.539394								N3	12	69	46	0.2					16	E4	37	18	0.345455
	16	C4	41	19	0.366667	0.600327	13	2	0.733333	0.692256	4	17	0.619048	0.420842	58	38	0.208333	0.472543							N4	12	52	72	0.16129	0.206946				16	Q4	9	27	0.5	0.28891
	17	Q3	22	23	0.0222222		5	37	0.761905		6	0	1		33	60	0.290323								P1	13	53	58	0.045045					17	N1	24	25	0.0204082
	17	N1	37	26	0.174603		9	4	0.384615		8	26	0.529412		54	56	0.0181818								P2	13	33	35	0.0294118					17	P3	39	16	0.418182
	17	P3	46	56	0.0980392	0.0982882	31	4	0.771429	0.639316	20	8	0.428571	0.652661	97	68	0.175758	0.161421							P3	13	35	44	0.113924					17	Q3	13	35	0.458333	0.298974
	18	T4	51	40	0.120879		10	13	0.130435		12	1	0.846154		73	54	0.149606								P4	13	70	54	0.129032	0.0793533				18	T4	24	22	0.0434783
	18	W3	35	37	0.0277778		27	13	0.35		0	10	1		62	60	0.0163934								Q1	14	35	54	0.213483					18	U4	32	32	0
	18	U4	37	46	0.108434	0.0856969	8	19	0.407407	0.295947	11	12	0.0434783	0.629877	56	77	0.157895	0.107965							Q2	14	59	44	0.145631					18	W3	13	15	0.0714286	0.0383023
	19	B4	36	8	0.636364		0	1	1		0	7	1		36	16	0.384615								Q3	14	41	49	0.0888889					19	B4	26	5	0.677419
	19	P2	6	29	0.657143		12	21	0.272727		0	0			18	50	0.470588								Q4	14	44	32	0.157895	0.151474				19	M4	8	30	0.578947
	19	M4	2	7	0.555556	0.616354	21	11	0.3125	0.528409	7	0	1	1	30	18	0.25	0.368401							R1	15	87	52	0.251799					19	P2	7	6	0.0769231	0.44443
	20	Q1	42	27	0.217391		54	36	0.2		3	0	1		99	63	0.222222								R2	15	36	77	0.362832					20	A1	16	21	0.135135
	20	A1	14	27	0.317073		34	39	0.0684932		21	7	0.5		69	73	0.028169								R3	15	65	19	0.547619					20	Q1	11	21	0.3125
	20	R2	34	36	0.0285714	0.187679	10	23	0.393939	0.220811	4	21	0.68	0.726667	48	80	0.25	0.166797							R4	15	32	72	0.384615	0.386716				20	R2	29	14	0.348837	0.265491
	21	H3	12	8	0.2		13	18	0.16129		5	12	0.411765		30	38	0.117647								S1	16	59	67	0.0634921					21	A3	12	16	0.142857
	21	G1	7	12	0.263158		4	13	0.529412		1	5	0.666667		12	30	0.428571								S2	16	72	59	0.0992366					21	G1	16	39	0.418182
	21	A3	1	0	1	0.487719	15	1	0.875	0.521901	13	2	0.733333	0.603922	29	3	0.8125	0.452906							S3	16	65	75	0.0714286					21	H3	47	20	0.402985	0.321341
	22	H1	4	76	0.9		2	17	0.789474		8	7	0.0666667		14	100	0.754386								S4	16	61	56	0.042735	0.0692231				22	H1	12	32	0.454545
	22	M2	32	4	0.777778		10	7	0.176471		6	12	0.333333		48	23	0.352113								T1	17	32	60	0.304348					22	M2	25	14	0.282051
	22	T1	44	0	1	0.892593	16	4	0.6	0.521981	5	0	1	0.466667	65	4	0.884058	0.663519							T2	17	38	37	0.0133333					22	T1	21	12	0.272727	0.336441
	23	B3	1	0	1		0	3	1		0	0			1	3	0.5								T3	17	69	31	0.38					23	B3	35	5	0.75
	23	C1	45	17	0.451613		12	27	0.384615		17	4	0.619048		74	48	0.213115								T4	17	42	53	0.115789	0.180003				23	C1	23	14	0.243243
	23	E2	17	46	0.460317	0.63731	29	11	0.45	0.611538	4	17	0.619048	0.619048	50	74	0.193548	0.302221							U1	18	58	43	0.148515					23	E2	4	43	0.829787	0.607677
	24	A2	45	3	0.875		18	16	0.0588235		16	0	1		79	19	0.612245								U2	18	55	58	0.0265487					24	A2	13	35	0.458333
	24	U1	14	51	0.569231		5	24	0.655172		1	17	0.888889		20	92	0.642857								U3	18	25	29	0.0740741					24	Q2	61	18	0.544304
	24	Q2	50	55	0.047619	0.497283	36	19	0.309091	0.341029	12	12	0	0.62963	98	86	0.0652174	0.440106							U4	18	38	46	0.0952381	0.0860939				24	U1	12	33	0.466667	0.489768
	25	P4	5	2	0.428571		5	2	0.428571		3	0	1		13	4	0.529412								W1	19	54	22	0.421053					25	P4	20	10	0.333333
	25	U2	2	5	0.428571		2	5	0.428571		0	7	1		4	17	0.619048								W2	19	48	44	0.0434783					25	R3	13	23	0.277778
	25	R3	0	0		0.428571	0	0		0.428571	6	2	0.5	0.833333	6	2	0.5	0.549486							W3	19	38	64	0.254902					25	U2	15	15	0	0.203704
																									W4	19	29	39	0.147059	0.216623

## Sheet: Social Preference Test
HII	ID_Subject	Cage	left0_right1	day	pref	duration	Legend	rat_ID	duration_difference	CAGES	LII	ID_rat	c_a_g_e	left_right	day_combi	preference	durations	duration_diff	ratID	CAGE_s
HII:	C2	5	1	1	1	459	*duration in sec	C2	39	5	LII:	D3	8	0	1	1	471	60	D3	8
test objects: H or I	C2	5	1	1	2	420	*pref / preference = test objects: 1 = seeder, 2 = I rat				test objects: L or I	D3	8	0	1	2	411
	W1	2	0	1	1	482	*day = trial day: 1 =: trial days 1+3, 2 =: days 2+4	W1	-68	2		N4	7	0	1	1	367	-1	N4	7
	W1	2	0	1	2	550	*left0_right1 = seeder location					N4	7	0	1	2	368
	H2	3	0	1	1	344		H2	-227	3		S4	6	1	1	1	375	-84	S4	6
	H2	3	0	1	2	571						S4	6	1	1	2	459
	K3	1	1	1	1	489		K3	193	1		E3	9	1	1	1	340	17	E3	9
	K3	1	1	1	2	296						E3	9	1	1	2	323
	W2	4	1	1	1	320		W2	-19	4		L2	10	0	1	1	502	146	L2	10
	W2	4	1	1	2	339						L2	10	0	1	2	356
	S1	2	1	2	1	422		S1	106	2		E1	8	1	2	1	383	71	E1	8
	S1	2	1	2	2	316						E1	8	1	2	2	312
	K4	5	0	2	1	473		K4	7	5		M3	10	1	2	1	381	43	M3	10
	K4	5	0	2	2	466						M3	10	1	2	2	338
	D2	3	1	2	1	534		D2	200	3		T2	9	0	2	1	461	193	T2	9
	D2	3	1	2	2	334						T2	9	0	2	2	268
	F3	1	0	2	1	344		F3	-72	1		L3	7	1	2	1	333	-149	L3	7
	F3	1	0	2	2	416						L3	7	1	2	2	482
	N2	4	0	2	1	487		N2	42	4		P1	6	0	2	1	376	-154	P1	6
	N2	4	0	2	2	445						P1	6	0	2	2	530			6
